# Supplementary material for: Mechanistic insights into the remarkable catalytic activity of nanosized Co@C composites for hydrogen desorption from the LiBH4–2LiNH2 system
Source: Royal Society of Chemistry journal article supplement (doi:10.1039/c7cy00192d), 2017-01-01
Supplement: c7cy00192d1.pdf [file c7cy00192d1.pdf]

## Electronic Supplementary Information

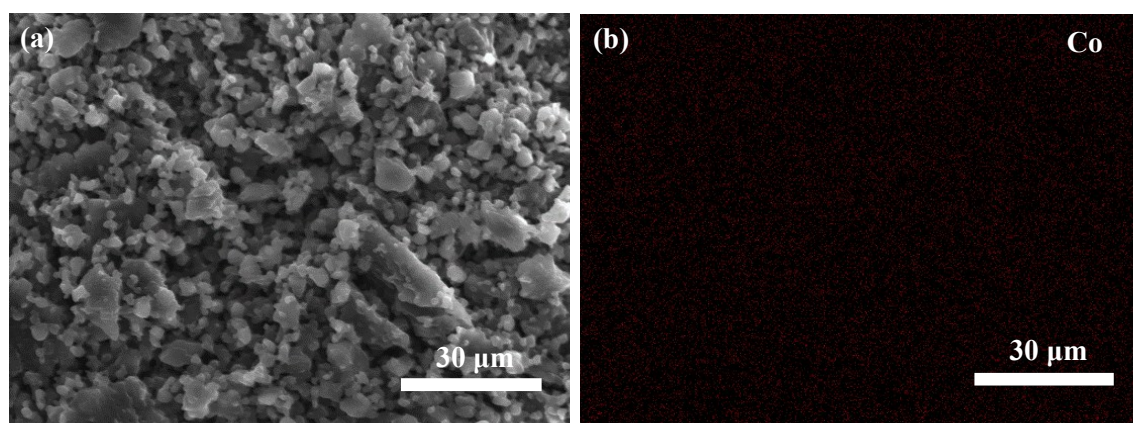

Fig. S1 EDS mapping of the as-prepared  $\text{LiBH}_4\text{-}2\text{LiNH}_2\text{-}5\text{ wt\% Co@C}$  sample.

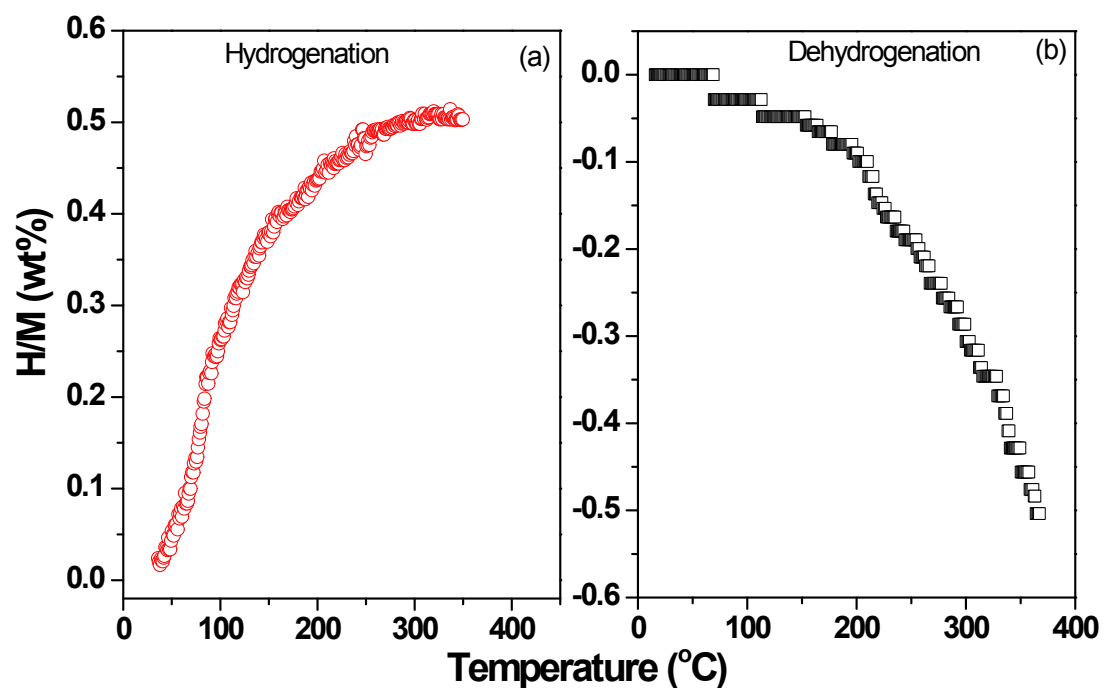

Fig. S2 Hydrogenation (a) and dehydrogenation (b) curves of the  $\text{LiBH}_4\text{-}2\text{LiNH}_2\text{-}5\text{ wt\% Co@C}$  sample at 3rd cycle.

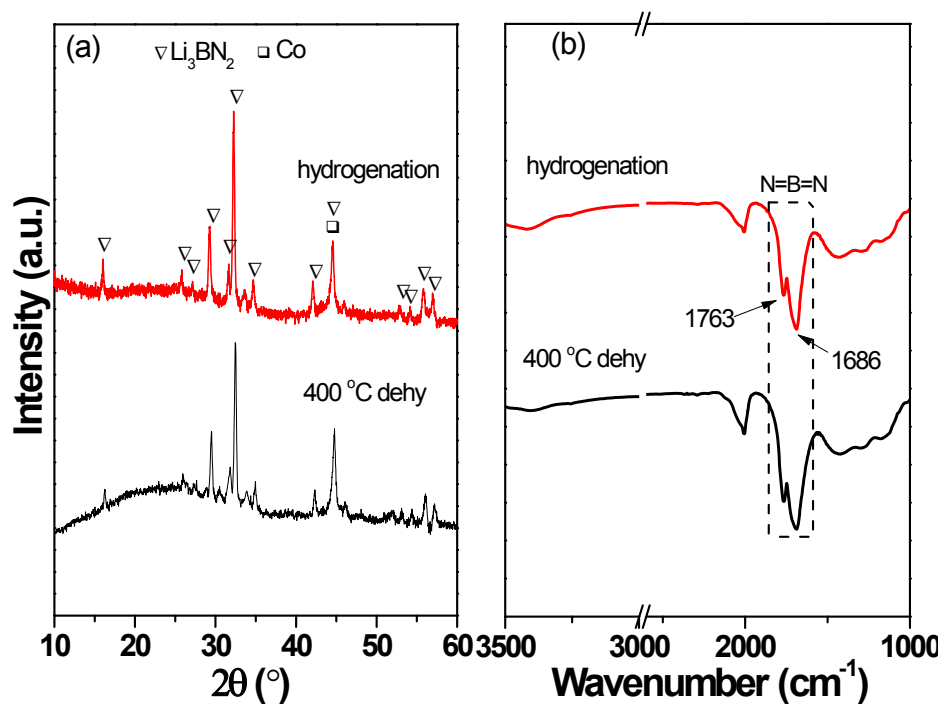

Fig. S3 XRD (a) and FTIR (b) of the hydrogenated 5 wt% Co@C-containing sample.
